# Supplementary material
Source: ML conference proceedings conference paper supplement (https://proceedings.mlr.press/v130/zhang21a.html)
Supplement: Supplementary file 1 [file zhang21a-supp.pdf]

## Appendix

### A Proof of Section 2

#### A.1 Proof of Theorem 3

Before presenting the proof, let us first prove a lemma.

**Lemma 3.** *Suppose  $\Phi$  satisfies Assumptions 1 and 3. For any  $y_1, y_2 \in \mathcal{Y}$ , define  $x^*(y_1)$  and  $x^*(y_2)$  as  $x^*(y_i) = \arg \min_{x \in \mathcal{X}} \Phi(x, y_i)$  for  $i = 1, 2$ . Similarly, for any  $x_1, x_2 \in \mathcal{X}$ , define  $y^*(x_1)$  and  $y^*(x_2)$  as  $y^*(x_i) = \operatorname{argmax}_{y \in \mathcal{Y}} \Phi(x_i, y)$ ,  $i = 1, 2$ . Therefore, it holds that*

$$\|x^*(y_1) - x^*(y_2)\| \leq \frac{L_{xy}}{\mu_x} \|y_1 - y_2\|, \quad \|y^*(x_1) - y^*(x_2)\| \leq \frac{L_{xy}}{\mu_y} \|x_1 - x_2\|.$$

The proof of this lemma is presented in Appendix E.1. Now we present the proof of the Theorem 3.

*Proof.* For the ease of notation, let us denote the Lipschitz constant

$$\ell_x(\xi) = \sup_{y \in \mathcal{Y}} \ell_x(\xi, y) \quad \text{and} \quad \ell_y(\xi) = \sup_{x \in \mathcal{X}} \ell_y(\xi, x).$$

For  $\forall 1 \leq i \leq n$ , denote

$$\begin{cases} x^*(\hat{y}_{(i)}) = \arg \min_{x \in \mathcal{X}} \Phi(x, \hat{y}_{(i)}), \\ y^*(\hat{x}_{(i)}) = \operatorname{argmax}_{y \in \mathcal{Y}} \Phi(\hat{x}_{(i)}, y). \end{cases}$$

Similarly we can define  $x^*(\hat{y})$  and  $y^*(\hat{x})$ . Therefore,

$$\begin{aligned} & \Phi_{\xi_i}(\hat{x}_{(i)}, y^*(\hat{x}_{(i)})) - \Phi_{\xi_i}(x^*(\hat{y}_{(i)}), \hat{y}_{(i)}) \\ & \stackrel{(a)}{\leq} \Phi_{\xi_i}(\hat{x}_{(i)}, y^*(\hat{x})) - \Phi_{\xi_i}(x^*(\hat{y}), \hat{y}_{(i)}) + \ell_x(\xi_i) \|x^*(\hat{y}_{(i)}) - x^*(\hat{y})\| + \ell_y(\xi_i) \|y^*(\hat{x}_{(i)}) - y^*(\hat{x})\| \\ & \stackrel{(b)}{\leq} \Phi_{\xi_i}(\hat{x}_{(i)}, y^*(\hat{x})) - \Phi_{\xi_i}(x^*(\hat{y}), \hat{y}_{(i)}) + \frac{L_{xy} \ell_x(\xi_i)}{\mu_x} \|\hat{y}_{(i)} - \hat{y}\| + \frac{L_{xy} \ell_y(\xi_i)}{\mu_y} \|\hat{x}_{(i)} - \hat{x}\| \\ & \stackrel{(c)}{\leq} \underbrace{\Phi_{\xi_i}(\hat{x}, y^*(\hat{x})) - \Phi_{\xi_i}(x^*(\hat{y}), \hat{y}) + \left( \frac{L_{xy} \ell_x(\xi_i)}{\mu_x} + \ell_y(\xi_i) \right) \|\hat{y}_{(i)} - \hat{y}\| + \left( \frac{L_{xy} \ell_y(\xi_i)}{\mu_y} + \ell_x(\xi_i) \right) \|\hat{x}_{(i)} - \hat{x}\|}_{T(i)}. \end{aligned} \tag{33}$$

The steps (a) and (c) are due to the function Lipschitz property in Assumption 2, and step (b) is due to Lemma 3. Consequently,

$$\begin{aligned} & \Delta^s(\hat{x}, \hat{y}) \\ & = \mathbf{E} \left[ \max_{y \in \mathcal{Y}} \Phi(\hat{x}, y) - \min_{x \in \mathcal{X}} \Phi(x, \hat{y}) \right] \\ & \stackrel{(a)}{=} \frac{1}{n} \sum_{i=1}^n \mathbf{E} [\Phi(\hat{x}_{(i)}, y^*(\hat{x}_{(i)})) - \Phi(x^*(\hat{y}_{(i)}), \hat{y}_{(i)})] \\ & \stackrel{(b)}{=} \frac{1}{n} \sum_{i=1}^n \mathbf{E} [\Phi_{\xi_i}(\hat{x}_{(i)}, y^*(\hat{x}_{(i)})) - \Phi_{\xi_i}(x^*(\hat{y}_{(i)}), \hat{y}_{(i)})] \\ & \stackrel{(c)}{\leq} \mathbf{E} \left[ \frac{1}{n} \sum_{i=1}^n (\Phi_{\xi_i}(\hat{x}, y^*(\hat{x})) - \Phi_{\xi_i}(x^*(\hat{y}), \hat{y})) \right] + \frac{1}{n} \sum_{i=1}^n \mathbf{E}[T(i)] \\ & \stackrel{(d)}{\leq} \frac{1}{n} \sum_{i=1}^n \mathbf{E}[T(i)]. \end{aligned} \tag{34}$$

The step (a) is because  $(\hat{x}, \hat{y})$  and  $(\hat{x}_{(i)}, \hat{y}_{(i)})$  are identically distributed. And the step (b) is because the independence between  $\xi_i$  and  $\Gamma(i)$ , which indicates that

$$\mathbf{E} [\Phi_{\xi_i}(\hat{x}_{(i)}, y^*(\hat{x}_{(i)}))] = \mathbf{E} [\mathbf{E} [\Phi_{\xi_i}(\hat{x}_{(i)}, y^*(\hat{x}_{(i)})) | \xi_i]] = \mathbf{E} [\Phi(\hat{x}_{(i)}, y^*(\hat{x}_{(i)}))].$$

The independence here is a crucial point and need to be carefully handled. The step (c) is due to (33). And the step (d) is because  $(\hat{x}, \hat{y})$  solves the ESP problem (2), which implies  $\hat{\Phi}_n(\hat{x}, y) - \hat{\Phi}_n(x, \hat{y}) \leq 0$  for  $\forall x \in \mathcal{X}, y \in \mathcal{Y}$ . Consequently

$$\mathbf{E} \left[ \frac{1}{n} \sum_{i=1}^n (\Phi_{\xi_i}(\hat{x}, y^*(\hat{x})) - \Phi_{\xi_i}(x^*(\hat{y}), \hat{y})) \right] = \mathbf{E} [\hat{\Phi}_n(\hat{x}, y^*(\hat{x})) - \hat{\Phi}_n(x^*(\hat{y}), \hat{y})] \leq 0.$$

Therefore, the last step to bound  $\Delta^s(\hat{x}, \hat{y})$  remains as follows,

$$\begin{aligned} & \frac{1}{n} \sum_{i=1}^n \mathbf{E}[T(i)] \\ &= \mathbf{E} \left[ \left\| \left( \frac{L_{xy}\ell_x(\xi_i)}{\mu_x} + \ell_y(\xi_i) \right) \|\hat{y}_{(i)} - \hat{y}\| + \left( \frac{L_{xy}\ell_y(\xi_i)}{\mu_y} + \ell_x(\xi_i) \right) \|\hat{x}_{(i)} - \hat{x}\| \right\|^2 \right] \\ &\stackrel{(a)}{\leq} \mathbf{E} \left[ \sqrt{\left( \frac{L_{xy}\ell_x(\xi_i)}{\sqrt{\mu_x}\mu_y} + \frac{\ell_x(\xi_i)}{\sqrt{\mu_x}} \right)^2 + \left( \frac{L_{xy}\ell_x(\xi_i)}{\mu_x\sqrt{\mu_y}} + \frac{\ell_y(\xi_i)}{\sqrt{\mu_y}} \right)^2} \times \sqrt{\mu_x \|\hat{x} - \hat{x}_{(i)}\|^2 + \mu_y \|\hat{y} - \hat{y}_{(i)}\|^2} \right] \\ &\stackrel{(b)}{\leq} \sqrt{\mathbf{E} \left[ \left( \frac{L_{xy}\ell_x(\xi_i)}{\sqrt{\mu_x}\mu_y} + \frac{\ell_x(\xi_i)}{\sqrt{\mu_x}} \right)^2 + \left( \frac{L_{xy}\ell_x(\xi_i)}{\mu_x\sqrt{\mu_y}} + \frac{\ell_y(\xi_i)}{\sqrt{\mu_y}} \right)^2 \right]} \times \sqrt{\mathbf{E} [\mu_x \|\hat{x} - \hat{x}_{(i)}\|^2 + \mu_y \|\hat{y} - \hat{y}_{(i)}\|^2]} \\ &\stackrel{(c)}{\leq} \sqrt{\frac{2L_{xy}^2(\ell_x^s)^2}{\mu_x\mu_y^2} + \frac{2(\ell_x^s)^2}{\mu_x} + \frac{2L_{xy}^2(\ell_x^s)^2}{\mu_x^2\mu_y} + \frac{2(\ell_y^s)^2}{\mu_y}} \cdot \frac{2}{n} \cdot \sqrt{\frac{(\ell_x^s)^2}{\mu_x} + \frac{(\ell_y^s)^2}{\mu_y}} \\ &\leq \frac{2\sqrt{2}}{n} \cdot \sqrt{\frac{L_{xy}^2}{\mu_x\mu_y} + 1} \cdot \left( \frac{(\ell_x^s)^2}{\mu_x} + \frac{(\ell_y^s)^2}{\mu_y} \right). \end{aligned}$$

The step (a) here is due to the Cauchy-Schwartz inequality, for any two vectors  $a$  and  $b$ ,  $a^\top b \leq \|a\|_2 \cdot \|b\|_2$ . The step (b) is the expectation version of Cauchy-Schwartz inequality, for any two random variables  $a$  and  $b$ ,  $\mathbf{E}[ab] \leq \sqrt{\mathbf{E}[a^2]} \cdot \sqrt{\mathbf{E}[b^2]}$ . And the step (c) is due to the fact that  $(a + b)^2 \leq 2(a^2 + b^2)$  and the stability argument of Lemma 1.

Finally, substituting this bound into the inequality (34) proves the theorem.  $\square$

## A.2 Proof of Theorem 4

To prove the Theorem 4, let us first present some definition and lemmas. We define the primal function  $f(x)$  and dual function  $g(y)$  as well as their empirical version  $\hat{f}_n(x)$  and  $\hat{g}_n(y)$ :

$$\begin{cases} f(x) = \max_y \Phi(x, y), \\ \hat{f}_n(x) = \max_y \hat{\Phi}_n(x, y), \end{cases} \quad \text{and} \quad \begin{cases} g(y) = \min_x \Phi(x, y), \\ \hat{g}_n(y) = \min_x \hat{\Phi}_n(x, y). \end{cases} \quad (35)$$

For the ease of notation, we also denote

$$x_n^*(y) = \operatorname{argmin}_x \hat{\Phi}_n(x, y) \quad \text{and} \quad y_n^*(x) = \operatorname{argmax}_y \hat{\Phi}_n(x, y). \quad (36)$$

As a result the following property holds true.

**Proposition 1.** *Under Assumption 1 and 3, the primal function  $f(x)$  and  $\hat{f}_n$  are  $\mu_x$ -strongly convex;  $\nabla f(x)$  is  $L_f$ -Lipschitz continuous, with  $L_f := L_x + L_{xy}^2/\mu_y$ . Similarly,  $g(y)$  and  $\hat{g}_n$  are  $\mu_y$ -strongly concave;  $\nabla g(y)$  is  $L_g$ -Lipschitz continuous, with  $L_g := L_y + L_{xy}^2/\mu_x$ .*

This proposition is a well known results, see e.g. Sanjabi et al. (2018).

**Lemma 4.** *The squared distance from the empirical solution to the population solution is bounded as*

$$\begin{cases} \|\hat{x} - x^*\|_2^2 \leq \frac{4}{\mu_x^2} \|\nabla_x \hat{\Phi}_n(x^*, y_n^*(x^*))\|_2^2 \\ \|\hat{y} - y^*\|_2^2 \leq \frac{4}{\mu_y^2} \|\nabla_y \hat{\Phi}_n(x_n^*(y^*), y^*)\|_2^2. \end{cases} \quad (37)$$

and

$$\mathbf{E} [\|\nabla_x \hat{\Phi}_n(x^*, y_n^*(x^*))\|_2^2] \leq \frac{1}{n} \left( \frac{8L_{xy}^2}{\mu_y^2} \mathbf{E} [\|\nabla_y \Phi_\xi(x^*, y^*)\|_2^2] + 2\mathbf{E} [\|\nabla_x \Phi_\xi(x^*, y^*)\|_2^2] \right) \quad (38)$$

and

$$\mathbf{E}[\|\nabla_y \hat{\Phi}_n(x_n^*(y^*), y^*)\|_2^2] \leq \frac{1}{n} \left( \frac{8L_{xy}^2}{\mu_x^2} \mathbf{E}[\|\nabla_x \Phi_\xi(x^*, y^*)\|_2^2] + 2\mathbf{E}[\|\nabla_y \Phi_\xi(x^*, y^*)\|_2^2] \right). \quad (39)$$

We provide the proof in Appendix E.2. As a result of Proposition 1 and Lemma 4, the proof of Theorem 4 will follow the following argument. By the Lipschitz continuity of  $\nabla f(x)$  and  $\nabla g(y)$ ,

$$\begin{aligned} & \max_{y \in \mathcal{Y}} \Phi(\hat{x}, y) - \min_{x \in \mathcal{X}} \Phi(x, \hat{y}) \\ &= f(\hat{x}) - g(\hat{y}) \\ &\leq f(x^*) + \frac{L_f}{2} \|\hat{x} - x^*\|_2^2 - \left( g(y^*) - \frac{L_g}{2} \|\hat{y} - y^*\|_2^2 \right) \\ &= \frac{L_f}{2} \|\hat{x} - x^*\|_2^2 + \frac{L_g}{2} \|\hat{y} - y^*\|_2^2. \end{aligned}$$

Taking expectation on both sides and substituting in the values of  $L_f$  and  $L_g$  in Proposition 1 proves the Theorem.

## B Proof of Section 3

### B.1 Assumptions on fast mixing time and uniform ergodicity

**Assumption 5** (Uniformly bounded ergodicity). *The Markov decision process is ergodic under any stationary policy  $\pi$ , and there exists  $\tau > 1$  such that*

$$\frac{1}{\sqrt{\tau}|\mathcal{S}|} \cdot \mathbf{1} \leq \sum_{a \in \mathcal{A}} y_a^\pi \leq \frac{\sqrt{\tau}}{|\mathcal{S}|} \cdot \mathbf{1},$$

where  $y^\pi$  is the stationary state-action distribution under the policy  $\pi$ .

**Assumption 6** (Fast mixing time). *There exists a constant  $t_{mix}$  such that for any stationary policy  $\pi$ ,*

$$t_{mix} \geq \min_t \left\{ t : \|P_\pi^t(s, \cdot) - \sum_{a \in \mathcal{A}} y_a^\pi\|_{TV} \leq 1/4, \forall s \in \mathcal{S} \right\},$$

where  $\|\cdot\|_{TV}$  is the total variation norm,  $P_\pi(s, s') = \sum_{a \in \mathcal{A}} \pi(a|s)P_a(s, s')$  is the transition probability matrix under policy  $\pi$  and  $P_\pi^t(s, s')$  is the  $t$ -step transition probability from  $s$  to  $s'$ .

### B.2 Proof of inequality (29)

To compute the upperbound of  $\Delta^w(\bar{x}, \bar{y})$ , we will first need the following proposition on the Lipschitz constants  $\ell_x^w$  and  $\ell_y^w$ , whose proof is delegated to Appendix E.3.

**Proposition 2.** *For any  $\xi$  there exist constants  $\ell_x(\xi, y)$  and  $\ell_y(\xi, x)$  s.t.  $\Phi_\xi(\cdot, y)$  is  $\ell_x(\xi, y)$ -Lipschitz under  $L_2$ -norm, and  $\Phi_\xi(x, \cdot)$  is  $\ell_y(\xi, x)$ -Lipschitz under  $L_1$ -norm. Moreover,*

$$\begin{cases} (\ell_x^w)^2 := \sup_{y \in \mathcal{Y}} \mathbf{E}_\xi[\ell_x^2(\xi, y)] = \mathcal{O}(\tau^3/|\mathcal{S}|), \\ (\ell_y^w)^2 := \sup_{x \in \mathcal{X}} \mathbf{E}_\xi[\ell_y^2(\xi, x)] = \mathcal{O}(t_{mix}^2). \end{cases}$$

For the rest of the proof, it suffices to specify the following details for Lemma 2. For the  $\Phi_\xi$ 's,  $\mu_x = \mu_y = 0$ . The norm  $\|\cdot\|$  is the  $L_2$ -norm  $\|\cdot\|_2$  and the norm  $\|\cdot\|$  on the  $L_1$ -norm  $\|\cdot\|_1$ . We set the regularizer to be

$$\Psi(x, y) = \frac{\alpha_x}{2} \|x\|_2^2 - \alpha_y \sum_{sa} y_{sa} \log y_{sa}.$$

$\Psi(\cdot, y)$  is  $\nu_x$ -strongly convex in  $x$  under the norm  $\|\cdot\|_2$  with  $\nu_x = \alpha_x$ .  $\Psi(x, \cdot)$  is  $\nu_y$ -strongly concave in  $y$  under the norm  $\|\cdot\|_1$  with  $\nu_y = \alpha_y$ . Furthermore, for any  $x \in \mathcal{X}$  and  $y \in \mathcal{Y}$ , we know

$$\begin{aligned} R &= \max_{x \in \mathcal{X}} \max_{y \in \mathcal{Y}} |\Psi(x, y)| \\ &\leq \max_{x \in \mathcal{X}} \frac{\alpha_x}{2} \|x\|_2^2 + \max_{y \in \mathcal{Y}} \left| \alpha_y \sum_{sa} y_{sa} \log y_{sa} \right| \\ &= 2\alpha_x |\mathcal{S}| t_{mix}^2 + \alpha_y \log(|\mathcal{S}||\mathcal{A}|). \end{aligned}$$

From Proposition 2, we know  $(\ell_x^w)^2 = O(\tau^3/|\mathcal{S}|)$  and  $(\ell_y^w)^2 = O(t_{mix}^2)$ . We get

$$\max_{y \in \mathcal{Y}} \mathbf{E}[\Phi(\hat{x}, y)] - \min_{x \in \mathcal{X}} \mathbf{E}[\Phi(x, \hat{y})] \leq O\left(\frac{\tau^3}{n|\mathcal{S}|\alpha_x} + \frac{t_{mix}^2}{n\alpha_y} + \alpha_x|\mathcal{S}|t_{mix}^2 + \alpha_y \log(|\mathcal{S}||\mathcal{A}|)\right).$$

To minimize the RHS, we set

$$\alpha_x = \frac{\tau^{3/2}}{\sqrt{n}|\mathcal{S}|t_{mix}} \quad \text{and} \quad \alpha_y = \frac{t_{mix}}{\sqrt{n} \log(|\mathcal{S}||\mathcal{A}|)}.$$

This immediately yields

$$\Delta^w(\hat{x}, \hat{y}) = \max_{y \in \mathcal{Y}} \mathbf{E}[\Phi(\hat{x}, y)] - \min_{x \in \mathcal{X}} \mathbf{E}[\Phi(x, \hat{y})] \leq O\left(\frac{t_{mix}}{\sqrt{n}} \left(\tau^{1.5} + \sqrt{\log(|\mathcal{S}||\mathcal{A}|)}\right)\right).$$

### B.3 Proof of Inequality (30)

To prove this result, let us first introduce the primal and dual linear programming formulations of the aMDP problem, which are

$$\text{(Primal-LP)} \quad \min_{\hat{v} \in \mathbf{R}, x \in \mathbf{R}^{|\mathcal{S}|}} \hat{v} \text{ s.t. } \hat{v} \cdot \mathbf{1} + (I - P_a)x - r_a \geq 0, \quad \forall a \in \mathcal{A}.$$

and

$$\begin{aligned} \text{(Dual-LP)} \quad & \min_{y \in \mathbf{R}^{|\mathcal{S}||\mathcal{A}|}} \langle y, r \rangle \\ \text{s.t.} \quad & y \geq 0, \quad \|y\|_1 = 1, \quad \sum_{a \in \mathcal{A}} (I - P_a^\top)y_a = 0. \end{aligned}$$

Then our saddle point problem (3) is the min-max formulation of this primal-dual LP pair. Let  $(\hat{v}^*, x^*)$  be the optimal solution to the (Primal-LP) (40) and let  $y^*$  be the optimal solution to the (Dual-LP), then  $(x^*, y^*)$  forms the saddle point of our problem (3). The following set of conditions are satisfied

$$\begin{cases} \hat{v}^* + (I - P_a)x^* - r_a \geq 0, \quad \forall a \in \mathcal{A}, & \text{(Primal feasibility)} \\ y^* \geq 0, \quad \|y^*\|_1 = 1, \quad \sum_{a \in \mathcal{A}} (I - P_a^\top)y_a^* = 0, & \text{(Dual feasibility)} \\ \langle y^*, r \rangle = \hat{v}^*, & \text{(Complementarity slackness)} \end{cases} \quad (40)$$

With these preliminary results, let us now provide the proof of this lemma.

*Proof.* Note that  $\Phi(x, y) := \langle y, r \rangle + \sum_{a \in \mathcal{A}} y_a^\top (P_a - I)x$ , by direct computation, we have

$$\begin{aligned} & \max_{y \in \mathcal{Y}} \mathbf{E}[\Phi(\bar{x}, y)] - \min_{x \in \mathcal{X}} \mathbf{E}[\Phi(x, \bar{y})] \\ & \geq \mathbf{E}[\Phi(\bar{x}, y^*) - \Phi(x^*, \bar{y})] \\ & = \mathbf{E}\left[\sum_{a \in \mathcal{A}} (y_a^*)^\top ((P_a - I)\bar{x} + r_a) - \sum_{a \in \mathcal{A}} (\bar{y}_a)^\top ((P_a - I)x^* + r_a)\right] \\ & \stackrel{(a)}{=} \langle y^*, r \rangle - \mathbf{E}\left[\sum_{a \in \mathcal{A}} (\bar{y}_a)^\top ((P_a - I)x^* + r_a)\right] \\ & \stackrel{(b)}{=} \hat{v}^* - \mathbf{E}\left[\sum_{a \in \mathcal{A}} (\bar{y}_a)^\top ((P_a - I)x^* + r_a)\right]. \end{aligned}$$

In the step (a), we apply the feasibility of  $y^*$ :  $\sum_{a \in \mathcal{A}} (y_a^*)^\top (P_a - I) = 0$ . In the step (b), we applied the fact that  $\hat{v}^* = \langle y^*, r \rangle$ . Hence we complete the proof.  $\square$

## C Proof of Section 4

### C.1 Proof of Inequality (32)

*Proof.* For the ease of notation. We denote the Lipschitz constant of the gradient of  $f$  as  $L$ . We denote the upper bound of the diameters of  $\mathcal{X}$  and  $\mathcal{Y}$  as  $c_1$ . Since  $A_\xi$  and  $b_\xi$  are uniformly upper bounded. We denote the upper bound of  $\|A_\xi\|_2$  and  $\|b\|_2$  as  $c_2$ . Then, let us specify the constants used in Theorem 3 as follows. Let

$$\begin{cases} \Phi_\xi(x, y) := r(x) + y^\top (A_\xi x - b_\xi) - f^*(y), \\ \Phi(x, y) := r(x) + y^\top (Ax - b) - f^*(y). \end{cases}$$

First  $\mu_x = \mu$  and  $\mu_y = 1/L$ . For the gradient Lipschitz constant, we know  $L_{xy} = \|A\|_2 \leq c_2$  since  $\nabla_{xy}\Phi(x, y) = A$ . For the function Lipschitz constant, we know for any  $\xi$ ,

$$\ell_x(\xi, y) = \ell_r + \|(A_\xi)^\top y\|_2 \leq \ell_r + c_1 c_2.$$

By Fenchel duality, we know when  $f(Ax + b) = f^*(y)$ , then  $\|\nabla f^*(y)\| = \|A^\top x + b\| \leq (c_1 + 1)c_2$ . Consequently, the Lipschitz constant of  $f^*$  in  $\mathcal{Y}$  is  $\ell_{f^*} = \mathcal{O}(c_1 c_2)$ . Then

$$\ell_y(\xi, x) = \ell_{f^*} + \|A_\xi x - b_\xi\|_2 \leq \mathcal{O}(c_1 c_2).$$

Therefore, we know that  $\ell_x^s = \mathcal{O}(\ell_r + c_1 c_2)$  and  $\ell_y^s = \mathcal{O}(c_1 c_2)$ . Substituting all the above constants into Theorem 3 yields

$$\begin{aligned} & \mathbf{E} \left[ \max_{y \in \mathcal{Y}} \Phi(\bar{x}, y) - \min_{x \in \mathcal{X}} \Phi(x, \bar{y}) \right] \\ & \leq \mathcal{O} \left( \sqrt{\frac{L_{xy}^2}{\mu_x \mu_y} \left( \frac{(\ell_x^s)^2}{n \mu_x} + \frac{(\ell_y^s)^2}{n \mu_y} \right)} \right) \\ & = \mathcal{O} \left( c_2 \sqrt{L/\mu} \cdot \left( \frac{c_2^2 c_1^2 + \ell_r^2}{n \mu} + \frac{c_1^2 c_2^2}{n/L} \right) \right) \\ & = \mathcal{O} \left( \frac{1}{n \mu^{1.5}} \right). \end{aligned} \tag{41}$$

Next, let  $A = \mathbf{E}_\xi[A_\xi]$  and  $b = \mathbf{E}_\xi[b_\xi]$ , then

$$\begin{aligned} \max_{y \in \mathcal{Y}} \Phi(\bar{x}, y) &= \max_{y \in \mathcal{Y}} r(\bar{x}) + y^\top (A\bar{x} - b) - f^*(y) \\ &= r(\bar{x}) + f(A\bar{x} - b) \\ &= F(\bar{x}), \end{aligned} \tag{42}$$

and

$$-\min_{x \in \mathcal{X}} \Phi(x, \bar{y}) \geq -\min_{x \in \mathcal{X}} \max_{y \in \mathcal{Y}} \Phi(x, y) = \min_{x \in \mathcal{X}} F(x). \tag{43}$$

Combining (41), (42) and (43) proves the result.  $\square$

### C.2 Proof of Theorem 6

To prove this theorem, we would like to first present the following result.

**Lemma 5.** (Hybrid generalization bound) Under the settings of Theorem 1, if Assumption 3 is satisfied in addition, we have

$$\begin{aligned} & \mathbf{E}[\max_{y \in \mathcal{Y}} \Phi(\hat{x}, y)] - \min_{x \in \mathcal{X}} \mathbf{E}[\Phi(x, \hat{y})] \\ & \leq \mathcal{O} \left( \sqrt{\frac{L_{xy}^2 (\ell_y^s)^2}{\mu_x \mu_y^2} + \frac{(\ell_x^s)^2}{\mu_x} + \frac{(\ell_y^s)^2}{\mu_y}} \cdot \sqrt{\mathbf{E}[\mu_x \|\hat{x} - \hat{x}_{(i)}\|^2 + \mu_y \|\hat{y} - \hat{y}_{(i)}\|^2]} \right). \end{aligned} \tag{44}$$

We provide the proof of this lemma in Appendix E.4. Based on this theorem and constants figured out in Appendix C.1, we get

$$\sqrt{\frac{L_{xy}^2(\ell_y^s)^2}{\mu_x\mu_y^2} + \frac{(\ell_x^s)^2}{\mu_x} + \frac{(\ell_y^s)^2}{\mu_y}} = \mathcal{O}\left(\sqrt{\frac{L^2}{\mu} + \frac{\ell_r^2}{\mu} + L}\right) = \mathcal{O}\left(\mu^{-\frac{1}{2}}\sqrt{L^2 + \ell_r^2 + L\mu}\right)$$

For the other term, it is worth noting that the result of Lemma lemma:stability-reg indicates the Lipschitz constant of the regularizer does not play a role in the stability bound. On the other hand, this result can also be interpreted as that the Lipschitz constant of the *deterministic* component of the objective function does not affect the stability bound. Therefore, if we view  $r(x)$  and  $f^*(y)$  as the "regularizers", then Lemma 1 indicates that

$$\sqrt{\mathbf{E}[\mu_x\|\hat{x} - \hat{x}_{(i)}\|^2 + \mu_y\|\hat{y} - \hat{y}_{(i)}\|^2]} \leq \mathcal{O}\left(\frac{1}{n}\sqrt{\frac{1}{\mu} + \frac{1}{1/L}}\right) = \mathcal{O}\left(\frac{1}{n\sqrt{\mu}}\sqrt{1 + L\mu}\right).$$

Due to our assumption that  $L\mu \leq \mathcal{O}(1)$ , the above result indicates that

$$\mathbf{E}\left[\max_{y \in \mathcal{Y}} \Phi(\bar{x}, y)\right] - \min_{x \in \mathcal{X}} \mathbf{E}[\Phi(x, \bar{y})] \leq \mathcal{O}\left(\frac{L + \ell_r}{n\mu}\right) = \mathcal{O}\left(\frac{1}{\mu \cdot n}\right).$$

In this case, (42) is still true, while (43) is replaced with

$$-\min_{x \in \mathcal{X}} \mathbf{E}[\Phi(x, \bar{y})] \stackrel{(a)}{\geq} -\min_{x \in \mathcal{X}} \Phi(x, \mathbf{E}[\bar{y}]) \geq -\min_{x \in \mathcal{X}} \max_{y \in \mathcal{Y}} \Phi(x, y) = \min_{x \in \mathcal{X}} F(x), \quad (45)$$

where step (a) is due to the Jensen's inequality. Combining (45), (42) and (45) proves the theorem.

## D Proof of Section 5

### D.1 Proof of Theorem 7

*Proof.* The result of this theorem is a direct corollary of Lemma 2. First, we will need to figure the corresponding algorithmic constants. Define

$$\Psi(x, y) = \frac{1}{\sqrt{n \log N_1}} \sum_i x_i \log x_i - \frac{1}{\sqrt{n \log N_2}} \sum_j y_j \log y_j$$

as the regularizer. Then we know  $\Psi$  is  $\nu_x$ -strongly convex under  $L_1$ -norm and  $\nu_y$ -strongly concave under  $L_1$ -norm, with  $\nu_x = \frac{1}{\sqrt{n \log N_1}}$  and  $\nu_y = \frac{1}{\sqrt{n \log N_2}}$ . Moreover, the magnitude of  $\Psi$  is upper bounded by

$$\begin{aligned} R &= \max_{x \in \Delta_{N_1}} \max_{y \in \Delta_{N_2}} |\Psi(x, y)| \\ &= \frac{1}{\sqrt{n \log N_1}} \log N_1 + \frac{1}{\sqrt{n \log N_2}} \log N_2 \\ &= \frac{1}{\sqrt{n}} \left( \sqrt{\log N_1} + \sqrt{\log N_2} \right). \end{aligned}$$

Denote  $\Phi_\xi(x, y) = x^\top A_\xi y$ , then clearly,  $\Phi_\xi$  is not an SC-SC function. Hence  $\mu_x = \mu_y = 0$ . Let the Lipschitz constants  $\ell_x(\xi, y)$  and  $\ell_y(\xi, x)$  be measured under the  $L_1$ -norm, then

$$\begin{aligned} \ell_x(\xi, y) &= \max_{x \in \Delta_{N_1}} \|\nabla_x \Phi_\xi(x, y)\|_\infty \\ &= \max_{x \in \Delta_{N_1}} \|A_\xi y\|_\infty \\ &= \max_{ij} |A_\xi(i, j)| \\ &= 1. \end{aligned}$$

Consequently, we have  $\ell_x^w = 1$ . Similarly, we have  $\ell_y(\xi, x) \leq 1$  and  $\ell_y^w \leq 1$ . Consequently, by Lemma 2, we have

$$\begin{aligned}\Delta^w(\hat{x}, \hat{y}) &\leq \frac{2(\ell_x^w)^2}{n(\mu_x + \nu_x)} + \frac{2(\ell_y^w)^2}{n(\mu_y + \nu_y)} + 2R \\ &= \frac{\sqrt{\log N_1} + \sqrt{\log N_2}}{\sqrt{n}} \\ &\leq 16 \frac{\sqrt{\log(N_1 N_2)}}{\sqrt{n}}.\end{aligned}$$

The last inequality is due to  $\sqrt{\log N_1} + \sqrt{\log N_2} \leq 2\sqrt{\log N_1 + \log N_2} = 2\sqrt{\log(N_1 N_2)}$ . Due to the definition of  $\Delta^w(\hat{x}, \hat{y})$ , we know that for any  $x \in \Delta_{N_1}$  and  $y \in \Delta_{N_2}$ ,

$$\begin{aligned}&\underbrace{\mathbf{E}[\bar{x}^\top A y - \bar{x}^\top A \bar{y}]}_{\geq 0} - \underbrace{\mathbf{E}[x^\top A \bar{y} - \bar{x}^\top A \bar{y}]}_{\leq 0} \\ &= \mathbf{E}[\bar{x}^\top A y - x^\top A \bar{y}] \leq \Delta^w(\hat{x}, \hat{y}) \\ &\leq \mathcal{O}\left(\frac{\sqrt{\log(N_1 N_2)}}{\sqrt{n}}\right).\end{aligned}$$

Consequently,  $\mathbf{E}[\bar{x}^\top A y - \bar{x}^\top A \bar{y}] \leq \mathcal{O}\left(\frac{\sqrt{\log(N_1 N_2)}}{\sqrt{n}}\right)$  for any  $y$ . Meaning that when the player 1 plays  $\bar{x}$ , in expectation, it does not gain much benefit for player 2 if he switches to any other fixed strategy  $y$ . Symmetrically, we have  $\mathbf{E}[x^\top A \bar{y} - \bar{x}^\top A \bar{y}]$ , meaning that when the player 2 plays the strategy  $\bar{y}$ , in expectation, it does not cause more lost for player 2 if player 1 switches to any other fixed strategy  $x$ .  $\square$

## E Other supporting lemmas

### E.1 Proof of Lemma 3

*Proof.* First, let us prove the result for  $\|x^*(y_1) - x^*(y_2)\|$  and the rest of the results can be proved parallelly. By the optimality condition we have

$$\begin{cases} \langle \nabla_x \Phi(x^*(y_1), y_1), x^*(y_2) - x^*(y_1) \rangle \geq 0, \\ \langle \nabla_x \Phi(x^*(y_2), y_2), x^*(y_1) - x^*(y_2) \rangle \geq 0. \end{cases}$$

Summing this up gives

$$\langle \nabla_x \Phi(x^*(y_2), y_2) - \nabla_x \Phi(x^*(y_1), y_1), x^*(y_1) - x^*(y_2) \rangle \geq 0.$$

By the strong convexity of  $\Phi(\cdot, y)$  and the  $L_{xy}$ -Lipschitz continuity of  $\nabla_x \Phi(x, y)$  in terms of  $y$ ,

$$\begin{aligned}0 &\leq \langle \nabla_x \Phi(x^*(y_2), y_2) - \nabla_x \Phi(x^*(y_1), y_1), x^*(y_1) - x^*(y_2) \rangle \\ &= \langle \nabla_x \Phi(x^*(y_2), y_2) - \nabla_x \Phi(x^*(y_1), y_2), x^*(y_1) - x^*(y_2) \rangle + \langle \nabla_x \Phi(x^*(y_1), y_2) - \nabla_x \Phi(x^*(y_1), y_1), x^*(y_1) - x^*(y_2) \rangle \\ &\leq -\mu_x \|x^*(y_1) - x^*(y_2)\|^2 + \|\nabla_x \Phi(x^*(y_1), y_2) - \nabla_x \Phi(x^*(y_1), y_1)\|_* \|x^*(y_1) - x^*(y_2)\| \\ &\leq -\mu_x \|x^*(y_1) - x^*(y_2)\|^2 + L_{xy} \|y_1 - y_2\| \cdot \|x^*(y_1) - x^*(y_2)\|.\end{aligned}$$

Consequently,

$$\|x^*(y_1) - x^*(y_2)\| \leq \frac{L_{xy}}{\mu_x} \|y_1 - y_2\|.$$

The other part of the result follows the same line of proof.  $\square$

### E.2 Proof of Lemma 4

*Proof.* Because  $\hat{x} = \operatorname{argmin}_x \hat{f}_n(x)$ , and  $\hat{f}_n(\cdot)$  is  $\mu_x$ -strongly convex, we have

$$\begin{aligned}0 &\geq \hat{f}_n(\hat{x}) - \hat{f}_n(x^*) \\ &\geq \langle \nabla \hat{f}_n(x^*), \hat{x} - x^* \rangle + \frac{\mu_x}{2} \|\hat{x} - x^*\|_2^2 \\ &= \langle \nabla_x \hat{\Phi}_n(x^*, y_n^*(x^*)), \hat{x} - x^* \rangle + \frac{\mu_x}{2} \|\hat{x} - x^*\|_2^2,\end{aligned}$$

where the last row is due to the Danskin's theorem. By rearranging the terms, we get

$$\frac{\mu_x}{2} \|\hat{x} - x^*\|_2^2 \leq -\langle \nabla_x \hat{\Phi}_n(x^*, y_n^*(x^*)), \hat{x} - x^* \rangle \leq \|\nabla_x \hat{\Phi}_n(x^*, y_n^*(x^*))\|_2 \cdot \|\hat{x} - x^*\|_2.$$

Deviding both sides by  $\|\hat{x} - x^*\|_2$  and then square both sides proves the first inequality of (37). The second inequality for (37) can be proved similarly.

Next, let us focus on the first inequality of (38).

$$\begin{aligned} & \mathbf{E}[\|\nabla_x \hat{\Phi}_n(x^*, y_n^*(x^*))\|_2^2] \\ &= \mathbf{E}[\|\nabla_x \hat{\Phi}_n(x^*, y_n^*(x^*)) - \nabla_x \hat{\Phi}_n(x^*, y^*) + \nabla_x \hat{\Phi}_n(x^*, y^*)\|_2^2] \\ &\leq 2\mathbf{E}[\|\nabla_x \hat{\Phi}_n(x^*, y_n^*(x^*)) - \nabla_x \hat{\Phi}_n(x^*, y^*)\|_2^2] + 2\mathbf{E}[\|\nabla_x \hat{\Phi}_n(x^*, y^*)\|_2^2] \\ &\leq 2L_{xy}^2 \mathbf{E}[\|y^* - y_n^*(x^*)\|_2^2] + 2\mathbf{E}[\|\nabla_x \hat{\Phi}_n(x^*, y^*)\|_2^2]. \end{aligned} \quad (46)$$

Note that  $\mathbf{E}[\nabla_x \hat{\Phi}_n(x^*, y^*)] = \nabla_x \Phi(x^*, y^*) = 0$ , we have

$$\begin{aligned} & \mathbf{E}[\|\nabla_x \hat{\Phi}_n(x^*, y^*)\|_2^2] \\ &= \mathbf{E} \left[ \left\| \frac{1}{n} \sum_{\xi \in \Gamma} \nabla_x \Phi_\xi(x^*, y^*) - \mathbf{E}[\nabla_x \Phi_\xi(x^*, y^*)] \right\|_2^2 \right] \\ &= \frac{1}{n} \mathbf{E}_\xi [\|\nabla_x \Phi_\xi(x^*, y^*)\|_2^2]. \end{aligned} \quad (47)$$

It is important that  $L_2$ -norm is used here so that the above variance equation chain holds. If another norm is used, (47) may not be true. For example if  $L_1$ -norm is used, an extra multiplicative factor of dimension will come into the bound. For the other term, note that

$$y_n^*(x^*) = \operatorname{argmax}_y \hat{\Phi}_n(x^*, y) \quad \text{and} \quad y^* = \operatorname{argmax}_y \Phi(x^*, y).$$

As a result, we have

$$\begin{aligned} 0 &\leq \hat{\Phi}_n(x^*, y_n^*(x^*)) - \hat{\Phi}_n(x^*, y^*) \\ &\leq \langle \nabla_y \hat{\Phi}_n(x^*, y^*), y_n^*(x^*) - y^* \rangle - \frac{\mu_y}{2} \|y_n^*(x^*) - y^*\|_2^2. \end{aligned}$$

With slight rearranging and apply Cauchy-Schwartz inequality, we have

$$\|y_n^*(x^*) - y^*\|_2 \leq \frac{2}{\mu_y} \|\nabla_y \hat{\Phi}_n(x^*, y^*)\|_2.$$

Taking expectation on both sides and we get

$$\begin{aligned} \mathbf{E}[\|y_n^*(x^*) - y^*\|_2^2] &\leq \frac{4}{\mu_y^2} \mathbf{E}[\|\nabla_y \hat{\Phi}_n(x^*, y^*)\|_2^2] \\ &= \frac{4}{\mu_y^2} \mathbf{E}[\|\nabla_y \hat{\Phi}_n(x^*, y^*) - \nabla_y \Phi(x^*, y^*)\|_2^2] \\ &\leq \frac{4}{n\mu_y^2} \mathbf{E}_\xi [\|\nabla_y \Phi_\xi(x^*, y^*)\|_2^2]. \end{aligned} \quad (48)$$

The argument here is parallel to that of (47). Combining (46), (47), and (48), we have

$$\begin{aligned} & \mathbf{E}[\|\nabla_x \hat{\Phi}_n(x^*, y_n^*(x^*))\|_2^2] \\ &\leq \frac{1}{n} \left( \frac{8L_{xy}^2}{\mu_y^2} \mathbf{E}_\xi [\|\nabla_y \Phi_\xi(x^*, y^*)\|_2^2] + 2\mathbf{E}_\xi [\|\nabla_x \Phi_\xi(x^*, y^*)\|_2^2] \right). \end{aligned}$$

The second inequality can be proved through a completely parallel way. □

### E.3 Proof of Proposition 2

*Proof.* First, note that the Lipschitz continuity in  $x$  variable is measured under  $L_2$ -norm, and the Lipschitz continuity in  $y$  variable is measured under the  $L_1$ -norm. Because the dual norms of  $\|\cdot\|_2$  and  $\|\cdot\|_1$  are  $\|\cdot\|_2$  and  $\|\cdot\|_\infty$  respectively, we have

$$\begin{cases} \ell_y^2(\xi, x) = \sup_{y \in \mathcal{Y}} \|\nabla_y \Phi_\xi(x, y)\|_\infty^2, \\ \ell_x^2(\xi, y) = \sup_{x \in \mathcal{X}} \|\nabla_x \Phi_\xi(x, y)\|_2^2. \end{cases}$$

By direct calculation, we know

$$\nabla_{y_a} \Phi_\xi(x, y) = \hat{r}_a - x + u_a \quad \text{with} \quad u_{a,s} = \sum_{s' \in \mathcal{S}} \delta_\xi(s, a, s') x_{s'},$$

where  $\hat{r}_a = [\hat{r}_{1,a}, \hat{r}_{2,a}, \dots, \hat{r}_{|\mathcal{S}|,a}]^\top$ . Consequently,

$$\begin{aligned} \|\nabla_y \Phi_\xi(x, y)\|_\infty &= \max_{a \in \mathcal{A}} \|\nabla_{y_a} \Phi_\xi(x, y)\|_\infty \\ &\leq \max_{a \in \mathcal{A}} \|\hat{r}_a\|_\infty + \|x\|_\infty + \|u_a\|_\infty \\ &\leq 1 + 4t_{mix}. \end{aligned}$$

As a result we have  $(\ell_y^w)^2 = \mathcal{O}(t_{mix}^2)$ . For  $\ell_x$ , we first compute the gradient as follows

$$\nabla_x \Phi_\xi(x, y) = -\sum_{a \in \mathcal{A}} y_a + w \quad \text{with} \quad w_{s'} = \sum_{s,a} y_{sa} \delta_\xi(s, a, s').$$

Consequently, for any fixed  $y \in \mathcal{Y}$ ,

$$\begin{aligned} \mathbf{E}_\xi[\ell_x^2(\xi, y)] &= \|\nabla_x \Phi_\xi(x, y)\|_2^2 \\ &\leq 2\left\|\sum_{a \in \mathcal{A}} y_a\right\|_2^2 + 2\mathbf{E}_\xi[\|w\|_2^2] \\ &= 2\left\|\sum_{a \in \mathcal{A}} y_a\right\|_2^2 + 2\|\mathbf{E}[w]\|_2^2 + 2\mathbf{E}_\xi[\|w - \mathbf{E}[w]\|_2^2]. \end{aligned} \tag{49}$$

Note that  $\sum_{a \in \mathcal{A}} y_a \leq \frac{\sqrt{\tau}}{|\mathcal{S}|} \cdot \mathbf{1}$ , we know  $\|\sum_{a \in \mathcal{A}} y_a\|_2^2 \leq \frac{\tau}{|\mathcal{S}|}$ . By directly calculating the expectation, we know

$$\mathbf{E}_\xi[w_{s'}] = \sum_{s,a} y_{sa} P_a(s, s').$$

Because for a particular  $s'$ ,  $\delta_\xi(s_1, a_1, s')$  is independent from  $\delta_\xi(s_2, a_2, s')$ , we can compute the variance term as

$$\begin{aligned} &\mathbf{E}_\xi[\|w - \mathbf{E}[w]\|_2^2] \\ &= \sum_{s'} \mathbf{E}_\xi \left[ \left( \sum_{sa} y_{sa} (\delta_\xi(s, a, s') - P_a(s, s')) \right)^2 \right] \\ &= \sum_{s'} \sum_{sa} y_{sa}^2 \mathbf{E}_\xi \left[ (\delta_\xi(s, a, s') - P_a(s, s'))^2 \right] \\ &= \sum_{s'} \sum_{sa} y_{sa}^2 (1 - P_a(s, s')) P_a(s, s') \\ &\leq \sum_{s'} \sum_{sa} y_{sa}^2 P_a(s, s') \\ &\leq \sum_{sa} y_{sa}^2 \\ &\stackrel{(a)}{\leq} \left\| \sum_a y_a \right\|_2^2 \\ &\leq \tau/|\mathcal{S}|. \end{aligned}$$

Where the step (a) is because  $y \geq 0$ . Now we bound the last term  $\|\mathbf{E}_\xi[w]\|_2^2$ . For the ease of discussion, let us define  $\bar{y} = 0.5y + 0.5 \frac{\mathbf{1}}{|\mathcal{S}||\mathcal{A}|}$ ,  $\bar{\lambda} = \sum_{a \in \mathcal{A}} \bar{y}_a$ , and  $\bar{\pi}(a|s) = \bar{y}_{sa}/\bar{\lambda}_s$ . Similarly, we define  $\hat{y} = \frac{\mathbf{1}}{|\mathcal{S}||\mathcal{A}|}$ ,  $\hat{\lambda} = \frac{\mathbf{1}}{|\mathcal{S}|}$ , and  $\hat{\pi}(a|s) = \frac{\mathbf{1}}{|\mathcal{A}|}$ .

Therefore, because both  $\bar{\pi}$  and  $\hat{\pi}$  are strictly positive, the corresponding Markov chains of the state transitions are ergodic. Hence,

$$\begin{aligned}
 & \|\mathbf{E}_{\xi}[w]\|_2^2 \\
 &= \sum_{s'} \left( \sum_{s,a} \left( y_{sa} + \frac{1}{|\mathcal{S}||\mathcal{A}|} - \frac{1}{|\mathcal{S}||\mathcal{A}|} \right) P_a(s, s') \right)^2 \\
 &\leq 2 \sum_{s'} \left( \sum_{s,a} \left( y_{sa} + \frac{1}{|\mathcal{S}||\mathcal{A}|} \right) P_a(s, s') \right)^2 \\
 &\quad + 2 \sum_{s'} \left( \sum_{s,a} \left( \frac{1}{|\mathcal{S}||\mathcal{A}|} \right) P_a(s, s') \right)^2 \\
 &\stackrel{(a)}{=} 8 \sum_{s'} \left( \sum_{s,a} \bar{y}_{sa} P_a(s, s') \right)^2 + 2 \sum_{s'} \left( \sum_{s,a} \hat{y}_{sa} P_a(s, s') \right)^2 \\
 &\stackrel{(b)}{=} 8 \sum_{s'} \left( \sum_s \bar{\lambda}_s \sum_a \bar{\pi}(a|s) P_a(s, s') \right)^2 \\
 &\quad + 2 \sum_{s'} \left( \sum_s \hat{\lambda}_s \sum_a \hat{\pi}(a|s) P_a(s, s') \right)^2 \\
 &\stackrel{(c)}{=} 8 \sum_{s'} \left( \sum_s \bar{\lambda}_s P_{\bar{\pi}}(s, s') \right)^2 + 2 \sum_{s'} \left( \sum_s \hat{\lambda}_s P_{\hat{\pi}}(s, s') \right)^2 \\
 &= 8 \|P_{\bar{\pi}}^T \bar{\lambda}\|_2^2 + 2 \|P_{\hat{\pi}}^T \hat{\lambda}\|_2^2 \\
 &\stackrel{(d)}{\leq} \frac{10\tau^3}{|\mathcal{S}|}.
 \end{aligned}$$

The step (a) and (b) follows directly from the definition of  $\bar{y}$ ,  $\bar{\lambda}$ ,  $\bar{\pi}$  and  $\hat{y}$ ,  $\hat{\lambda}$ ,  $\hat{\pi}$ . The step (c) is we define  $P_{\bar{\pi}}$  to be the state transition probability matrix under the policy  $\bar{\pi}$ , and  $P_{\bar{\pi}}(s, s') := \sum_a \bar{\pi}(a|s) P_a(s, s')$ ; Similar argument is made for  $P_{\hat{\pi}}$ . Finally, the step (d) is due to the following argument. Let  $\lambda^{\bar{\pi}}$  be the stationary state distribution under the policy  $\bar{\pi}$ , then by ergodicity property (Assumption 5) we have

$$0 \leq P_{\bar{\pi}}^T \mathbf{1} \leq P_{\bar{\pi}}^T (\sqrt{\tau} |\mathcal{S}| \lambda^{\bar{\pi}}) = \sqrt{\tau} |\mathcal{S}| \lambda^{\bar{\pi}} \leq \sqrt{\tau} |\mathcal{S}| \cdot \frac{\sqrt{\tau}}{|\mathcal{S}|} \cdot \mathbf{1} = \tau \mathbf{1}.$$

As a result,  $0 \leq P_{\bar{\pi}}^T \bar{\lambda} \leq P_{\bar{\pi}}^T \frac{\sqrt{\tau}}{|\mathcal{S}|} \mathbf{1} \leq \frac{\tau^{3/2}}{|\mathcal{S}|} \mathbf{1}$  and consequently  $\|P_{\bar{\pi}}^T \bar{\lambda}\|_2^2 \leq \tau^3 / |\mathcal{S}|$ . Similarly,  $\|P_{\hat{\pi}}^T \hat{\lambda}\|_2^2 \leq \tau^3 / |\mathcal{S}|$ . Substituting the following bounds

$$\begin{cases} \|\sum_a y_a\|_2^2 \leq O(\tau/|\mathcal{S}|) \\ \mathbf{E}_{\xi} [\|w - \mathbf{E}_{\xi}[w]\|_2^2] \leq O(\tau/|\mathcal{S}|) \\ \|\mathbf{E}_{\xi}[w]\|_2^2 \leq O(\tau^3/|\mathcal{S}|) \end{cases}$$

into (49) proves that  $\mathbf{E}_{\xi}[\ell_x^2(\xi, y)] \leq O(\tau^3/|\mathcal{S}|)$ . Consequently,  $(\ell_x^w)^2 = \sup_{y \in \mathcal{Y}} \mathbf{E}_{\xi}[\ell_x^2(\xi, y)] \leq O(\tau^3/|\mathcal{S}|)$ . This completes the proof of this proposition.  $\square$

#### E.4 Proof of Lemma 5

*Proof.* We still denote  $\ell_x(\xi) := \sup_{y \in \mathcal{Y}} \ell_x(\xi, y)$  and  $\ell_y(\xi) := \sup_{x \in \mathcal{X}} \ell_y(\xi, x)$ . Then, by the Lipschitz continuity assumption, we have

$$\begin{aligned}
 & \Phi_{\xi_i}(\hat{x}_{(i)}, y^*(\hat{x}_{(i)})) - \Phi_{\xi_i}(x, \hat{y}_{(i)}) \\
 &\leq \Phi_{\xi_i}(\hat{x}_{(i)}, y^*(\hat{x})) - \Phi_{\xi_i}(x, \hat{y}_{(i)}) + \ell_y(\xi_i) \|y^*(\hat{x}_{(i)}) - y^*(\hat{x})\| \\
 &\leq \Phi_{\xi_i}(\hat{x}_{(i)}, y^*(\hat{x})) - \Phi_{\xi_i}(x, \hat{y}_{(i)}) + \frac{L_{xy} \ell_y(\xi_i)}{\mu_y} \|\hat{x}_{(i)} - \hat{x}\| \\
 &\leq \underbrace{\Phi_{\xi_i}(\hat{x}, y^*(\hat{x})) - \Phi_{\xi_i}(x, \hat{y}) + \ell_y(\xi_i) \|\hat{y}_{(i)} - \hat{y}\|}_{T(i)} + \left( \frac{L_{xy} \ell_y(\xi_i)}{\mu_y} + \ell_x(\xi_i) \right) \|\hat{x}_{(i)} - \hat{x}\|.
 \end{aligned} \tag{50}$$

Similar to the proof of Theorem 1, we have

$$\begin{aligned}
 & \mathbf{E} \left[ \max_{y \in \mathcal{Y}} \Phi(\hat{x}, y) \right] - \min_{x \in \mathcal{X}} \mathbf{E} [\Phi(x, \hat{y})] \\
 &= \frac{1}{n} \sum_{i=1}^n \mathbf{E} [\Phi(\hat{x}_{(i)}, y^*(\hat{x}_{(i)}))] - \min_{x \in \mathcal{X}} \frac{1}{n} \sum_{i=1}^n \mathbf{E} [\Phi(x, \hat{y}_{(i)})] \\
 &= \max_{x \in \mathcal{X}} \frac{1}{n} \sum_{i=1}^n \mathbf{E} [\Phi_{\xi_i}(\hat{x}_{(i)}, y^*(\hat{x}_{(i)})) - \Phi_{\xi_i}(x, \hat{y}_{(i)})] \\
 &\leq \max_{x \in \mathcal{X}} \mathbf{E} \left[ \frac{1}{n} \sum_{i=1}^n (\Phi_{\xi_i}(\hat{x}, y^*(\hat{x})) - \Phi_{\xi_i}(x, \hat{y})) \right] + \frac{1}{n} \sum_{i=1}^n \mathbf{E}[T(i)] \\
 &\leq \frac{1}{n} \sum_{i=1}^n \mathbf{E}[T(i)].
 \end{aligned} \tag{51}$$

Then similar to the proof of Theorem 1 and Theorem 3, we prove the result by providing the following bound

$$\begin{aligned}
 & \frac{1}{n} \sum_{i=1}^n \mathbf{E}[T(i)] \\
 &= \mathbf{E} \left[ \left( \frac{L_{xy} \ell_y(\xi_i)}{\mu_y} + \ell_x(\xi_i) \right) \|\hat{x}_{(i)} - \hat{x}\| + \ell_y(\xi_i) \|\hat{y}_{(i)} - \hat{y}\| \right] \\
 &\leq \mathbf{E} \left[ \sqrt{\left( \frac{L_{xy} \ell_y(\xi_i)}{\sqrt{\mu_x \mu_y}} + \frac{\ell_x(\xi_i)}{\sqrt{\mu_x}} \right)^2 + \left( \frac{\ell_y(\xi_i)}{\sqrt{\mu_y}} \right)^2} \times \sqrt{\mu_x \|\hat{x} - \hat{x}_{(i)}\|^2 + \mu_y \|\hat{y} - \hat{y}_{(i)}\|^2} \right] \\
 &\leq \sqrt{\mathbf{E} \left[ \left( \frac{L_{xy} \ell_y(\xi_i)}{\sqrt{\mu_x \mu_y}} + \frac{\ell_x(\xi_i)}{\sqrt{\mu_x}} \right)^2 + \left( \frac{\ell_y(\xi_i)}{\sqrt{\mu_y}} \right)^2 \right]} \times \sqrt{\mathbf{E} [\mu_x \|\hat{x} - \hat{x}_{(i)}\|^2 + \mu_y \|\hat{y} - \hat{y}_{(i)}\|^2]} \\
 &\leq \mathcal{O} \left( \frac{1}{n} \sqrt{\frac{L_{xy}^2 (\ell_y^s)^2}{\mu_x \mu_y^2} + \frac{(\ell_x^s)^2}{\mu_x} + \frac{(\ell_y^s)^2}{\mu_y}} \times \sqrt{\mathbf{E} [\mu_x \|\hat{x} - \hat{x}_{(i)}\|^2 + \mu_y \|\hat{y} - \hat{y}_{(i)}\|^2]} \right)
 \end{aligned}$$

□
